# Supplementary material for: EventDTW: An Improved Dynamic Time Warping Algorithm for Aligning Biomedical Signals of Nonuniform Sampling Frequencies
Source: PubMed Central journal article supplement (PMC7273204; doi:10.3390/s20092700), 2020-05-09
Supplement: sensors-20-02700-s001.pdf [file sensors-20-02700-s001.pdf]

Supplementary Materials

# EventDTW: An Improved Dynamic Time Warping Algorithm for Aligning Biomedical Signals of Nonuniform Sampling Frequencies

Yihang Jiang <sup>1,†</sup>, Yuankai Qi <sup>1,†</sup>, Will Ke Wang <sup>1</sup>, Brinnae Bent <sup>1</sup>, Robert Avram <sup>2</sup>, Jeffery Olgin <sup>2</sup>, Jessilyn Dunn <sup>1,\*</sup>

<sup>1</sup> The Departments of Biomedical Engineering and Biostatistics & Bioinformatics, Duke University, Durham, NC 27708 USA,

<sup>2</sup> The Division of Cardiology and the Cardiovascular Research Institute, University of California San Francisco, San Francisco, CA 94143

\* Correspondence: [jessilyn.dunn@duke.edu](mailto:jessilyn.dunn@duke.edu)

† First co-authors

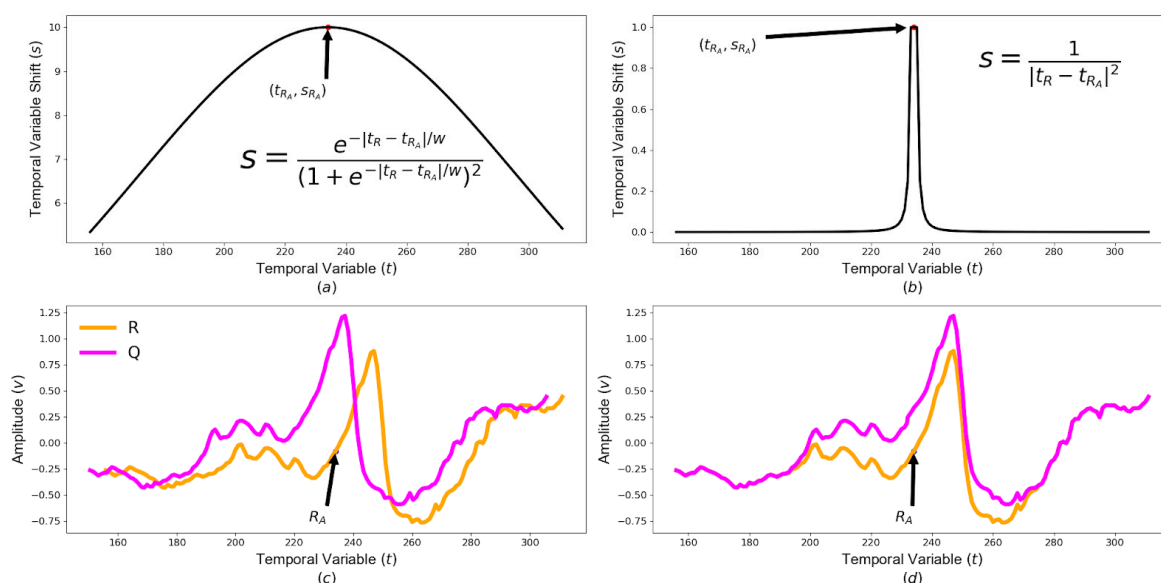

**Figure S1.** Comparison between temporal variable shift functions

**Figure 1.** (a) (b) Temporal variable shift function designed based on the derivative of sigmoid function and inverse square distance function. (c) (d) Part of signal near anchor point in Beef dataset from UCR Time Series Classification Archive warped based on (a) and (b)

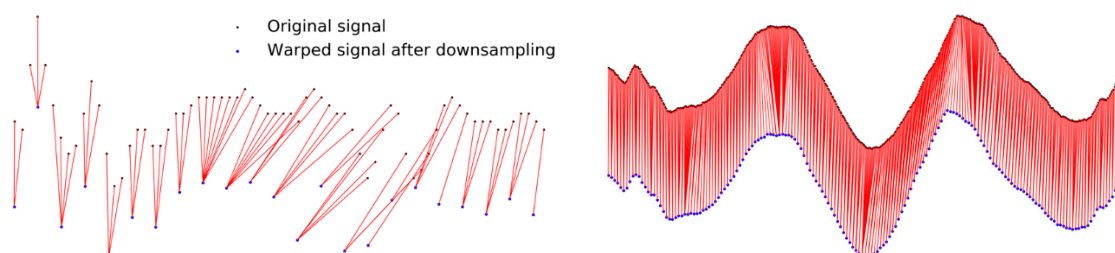

**Figure S2.** Examples in which eDTW perform worse than DTW.

**Table S1.** The Error Rate and Singularity Score for 84 datasets from the UCR Time Series Classification Archive

|                                    | Event<br>DTW | Event<br>DTW | DT<br>W      | DT<br>W      | shape<br>DTW | shape<br>DTW | dDT<br>W     | dDT<br>W     |
|------------------------------------|--------------|--------------|--------------|--------------|--------------|--------------|--------------|--------------|
|                                    | ER           | SS           | ER           | SS           | ER           | SS           | ER           | SS           |
| 50words_TRAIN                      | 0.0102<br>04 | 5.5828<br>89 | 0.010<br>882 | 5.860<br>42  | 0.0283<br>69 | 13.567<br>41 | 0.023<br>171 | 7.586<br>778 |
| Adiac_TRAIN                        | 0.0045<br>37 | 0.8666<br>67 | 0.004<br>547 | 0.901<br>149 | 0.0715<br>97 | 21.577<br>01 | 0.085<br>32  | 23.41<br>825 |
| ArrowHead_TRAIN                    | 0.0148<br>35 | 11.336<br>6  | 0.013<br>953 | 11.11<br>402 | 0.0443<br>97 | 20.522<br>09 | 0.030<br>228 | 13.20<br>623 |
| Beef_TRAIN                         | 0.0087<br>9  | 9.7908<br>32 | 0.009<br>682 | 11.14<br>829 | 0.0205<br>16 | 22.331<br>62 | 0.012<br>517 | 8.499<br>793 |
| BeetleFly_TRAIN                    | 0.0023<br>33 | 1.4455<br>88 | 0.002<br>362 | 1.537<br>941 | 0.0192<br>45 | 18.751<br>37 | 0.020<br>132 | 22.50<br>025 |
| BirdChicken_TRAIN                  | 0.0065<br>04 | 4.8133<br>36 | 0.005<br>525 | 3.907<br>878 | 0.0316<br>49 | 40.24        | 0.031<br>255 | 25.01<br>438 |
| Car_TRAIN                          | 0.0068<br>38 | 5.6540<br>83 | 0.006<br>723 | 5.026<br>461 | 0.0443<br>03 | 83.417<br>01 | 0.036<br>464 | 34.14<br>809 |
| CBF_TRAIN                          | 0.0266<br>74 | 6.2917<br>99 | 0.026<br>674 | 6.291<br>799 | 0.0985<br>68 | 38.939<br>68 | 0.056<br>078 | 8.672<br>222 |
| ChlorineConcentration_TRAIN        | 0.0131<br>65 | 3.9655<br>56 | 0.013<br>143 | 3.931<br>616 | 0.0955<br>89 | 36.772<br>12 | 0.052<br>783 | 7.167<br>475 |
| Coffee_TRAIN                       | 0.0060<br>84 | 4.2469<br>42 | 0.005<br>857 | 4.172<br>206 | 0.0227<br>21 | 12.225<br>26 | 0.016<br>917 | 7.493<br>684 |
| Computers_TRAIN                    | 0.1353<br>13 | 267.08<br>2  | 0.135<br>313 | 267.0<br>82  | 0.1642<br>72 | 306.25<br>88 | 0.132<br>968 | 256.4<br>508 |
| CinC_ECG_torso_TRAIN               | 0.0048<br>52 | 7.7979<br>6  | 0.007<br>242 | 9.029<br>677 | 0.0565<br>61 | 243.36<br>84 | 0.004<br>813 | 8.396<br>662 |
| Cricket_X_TRAIN                    | 0.0086<br>3  | 4.7845<br>67 | 0.008<br>586 | 4.772<br>567 | 0.0321<br>68 | 18.998<br>67 | 0.019<br>02  | 6.622<br>278 |
| Cricket_Y_TRAIN                    | 0.0143<br>77 | 6.8389<br>56 | 0.014<br>199 | 6.737<br>623 | 0.0359<br>16 | 21.348       | 0.018<br>684 | 7.438<br>389 |
| Cricket_Z_TRAIN                    | 0.0160<br>24 | 5.6445<br>53 | 0.015<br>97  | 5.660<br>553 | 0.0455<br>66 | 32.701       | 0.019<br>071 | 7.252<br>578 |
| DiatomSizeReduction_TRAIN          | 0.0069<br>54 | 3.9045<br>6  | 0.004<br>073 | 0.995<br>623 | 0.0726<br>93 | 65.670<br>72 | 0.077<br>625 | 35.92<br>303 |
| DistalPhalanxOutlineAgeGroup_TRAIN | 0.0122<br>05 | 3.4256<br>41 | 0.010<br>513 | 3.487<br>179 | 0.0729<br>23 | 7.1128<br>21 | 0.050<br>256 | 5.979<br>487 |
| DistalPhalanxOutlineCorrect_TRAIN  | 0.0139<br>49 | 3.8051<br>28 | 0.011<br>487 | 3.911<br>538 | 0.0744<br>1  | 7.2666<br>67 | 0.049<br>077 | 5.911<br>538 |

|                              |              |              |              |              |              |              |              |              |
|------------------------------|--------------|--------------|--------------|--------------|--------------|--------------|--------------|--------------|
| DistalPhalanxTW_TRAIN        | 0.0433<br>33 | 7.7282<br>05 | 0.041<br>846 | 7.728<br>205 | 0.0946<br>15 | 8.5230<br>77 | 0.070<br>667 | 10.80<br>855 |
| Earthquakes_TRAIN            | 0.0907<br>3  | 62.455<br>09 | 0.090<br>73  | 62.45<br>509 | 0.1968<br>42 | 139.06<br>79 | 0.130<br>171 | 95.34<br>793 |
| ECG200_TRAIN                 | 0.0189<br>18 | 3.5343<br>75 | 0.019<br>153 | 3.580<br>208 | 0.0533<br>94 | 11.383<br>33 | 0.061<br>492 | 10.41<br>076 |
| ECG5000_TRAIN                | 0.0181<br>64 | 4.4372<br>46 | 0.017<br>681 | 4.222<br>754 | 0.0524<br>48 | 15.797<br>1  | 0.047<br>746 | 15.54<br>614 |
| ECGFiveDays_TRAIN            | 0.0125<br>42 | 3.8266<br>67 | 0.012<br>727 | 3.900<br>741 | 0.0386<br>7  | 10.969<br>63 | 0.033<br>333 | 7.963<br>21  |
| ElectricDevices_TRAIN        | 0.3170<br>36 | 93.394<br>44 | 0.317<br>036 | 93.39<br>444 | 0.2388<br>44 | 70.608<br>33 | 0.449<br>227 | 126.5<br>423 |
| FaceAll_TRAIN                | 0.0149<br>5  | 2.6599<br>48 | 0.013<br>972 | 2.595<br>866 | 0.0990<br>77 | 30.021<br>71 | 0.036<br>656 | 3.734<br>884 |
| FaceFour_TRAIN               | 0.0103<br>35 | 6.7777<br>83 | 0.010<br>335 | 6.777<br>783 | 0.0163<br>09 | 8.9813<br>22 | 0.011<br>449 | 5.137<br>644 |
| FacesUCR_TRAIN               | 0.0118<br>31 | 3.5251<br>94 | 0.011<br>886 | 3.562<br>403 | 0.0820<br>97 | 18.954<br>26 | 0.029<br>42  | 3.810<br>853 |
| FISH_TRAIN                   | 0.0104<br>6  | 8.7627<br>9  | 0.009<br>443 | 8.022<br>411 | 0.0526<br>24 | 63.724<br>24 | 0.057<br>795 | 52.70<br>938 |
| FordA_TRAIN                  | 0.0019<br>69 | 1.7285<br>14 | 0.001<br>976 | 1.755<br>02  | 0.0111<br>84 | 7.8618<br>47 | 0.006<br>685 | 3.274<br>096 |
| FordB_TRAIN                  | 0.0019<br>58 | 1.7402<br>28 | 0.001<br>978 | 1.775<br>569 | 0.0096<br>52 | 5.7220<br>88 | 0.006<br>557 | 3.044<br>177 |
| Gun_Point_TRAIN              | 0.0227<br>48 | 7.5181<br>11 | 0.018<br>054 | 6.551<br>444 | 0.0572<br>24 | 20.066<br>67 | 0.058<br>286 | 15.10<br>686 |
| Ham_TRAIN                    | 0.0061<br>54 | 5.2239<br>97 | 0.006<br>226 | 5.385<br>069 | 0.0112<br>81 | 7.7734<br>27 | 0.007<br>799 | 3.451<br>282 |
| HandOutlines_TRAIN           | 0.0032<br>92 | 3.8203<br>19 | 0.002<br>961 | 1.249<br>506 | 0.1704<br>16 | 1658.3<br>68 | 0.047<br>254 | 204.0<br>377 |
| Haptics_TRAIN                | 0.0057<br>66 | 9.2026<br>62 | 0.005<br>596 | 9.573<br>793 | 0.0224<br>67 | 94.020<br>7  | 0.013<br>308 | 21.43<br>163 |
| Herring_TRAIN                | 0.0058<br>74 | 4.7372<br>65 | 0.006<br>563 | 4.756<br>971 | 0.0465<br>37 | 62.710<br>59 | 0.027<br>619 | 27.26<br>876 |
| InlineSkate_TRAIN            | 0.0058<br>91 | 21.970<br>75 | 0.005<br>884 | 21.96<br>285 | 0.1121<br>27 | 641.46<br>84 | 0.008<br>277 | 11.42<br>907 |
| InsectWingbeatSound_TRAIN    | 0.0184<br>97 | 8.3596<br>25 | 0.024<br>949 | 9.783<br>654 | 0.0307<br>24 | 11.045<br>88 | 0.023<br>604 | 7.670<br>211 |
| ItalyPowerDemand_TRAIN       | 0.0625       | 5.4458<br>33 | 0.062<br>5   | 5.445<br>833 | 0.1815<br>48 | 8.55         | 0.152<br>381 | 5.984<br>722 |
| LargeKitchenAppliances_TRAIN | 0.2256<br>83 | 421.71<br>7  | 0.238<br>333 | 434.0<br>703 | 0.2226<br>41 | 483.93<br>51 | 0.190<br>877 | 364.6<br>064 |

|                                      |        |        |       |       |        |        |       |       |
|--------------------------------------|--------|--------|-------|-------|--------|--------|-------|-------|
| Lighting2_TRAIN                      | 0.0393 | 34.133 | 0.039 | 34.12 | 0.0637 | 85.229 | 0.022 | 26.93 |
|                                      | 89     | 64     | 383   | 924   | 74     | 51     | 598   | 007   |
| Lighting7_TRAIN                      | 0.0377 | 24.332 | 0.037 | 24.26 | 0.0861 | 58.451 | 0.038 | 19.22 |
|                                      | 81     | 91     | 799   | 75    | 43     | 22     | 263   | 487   |
| MALLAT_TRAIN                         | 0.0063 | 16.271 | 0.007 | 17.35 | 0.0112 | 29.381 | 0.009 | 12.21 |
|                                      | 18     | 45     | 074   | 355   | 37     | 28     | 914   | 429   |
| Meat_TRAIN                           | 0.0099 | 9.3774 | 0.023 | 24.43 | 0.0385 | 44.208 | 0.015 | 7.028 |
|                                      | 33     | 42     | 93    | 881   | 29     | 65     | 473   | 596   |
| MedicalImages_TRAIN                  | 0.0496 | 6.1227 | 0.049 | 6.159 | 0.0971 | 15.391 | 0.111 | 8.955 |
|                                      | 84     | 95     | 874   | 158   | 59     | 25     | 269   | 387   |
| MiddlePhalanxOutlineAgeGroup_TRAIN   | 0.0157 | 3.8615 | 0.011 | 3.788 | 0.0630 | 6.6974 | 0.055 | 6.6   |
|                                      | 44     | 38     | 333   | 462   | 77     | 36     | 949   |       |
| MiddlePhalanxOutlineCorrect_TRAIN    | 0.0155 | 3.6705 | 0.011 | 3.648 | 0.0603 | 6.5743 | 0.056 | 6.292 |
|                                      | 38     | 13     | 692   | 718   | 08     | 59     | 718   | 308   |
| MiddlePhalanxTW_TRAIN                | 0.0514 | 8.7076 | 0.046 | 8.574 | 0.0806 | 8.2205 | 0.084 | 12.77 |
|                                      | 36     | 92     | 821   | 359   | 67     | 13     | 051   | 949   |
| MoteStrain_TRAIN                     | 0.0180 | 3.6924 | 0.017 | 3.625 | 0.0879 | 10.273 | 0.077 | 12.46 |
|                                      | 78     | 6      | 549   | 794   | 19     | 81     | 954   | 27    |
| NonInvasiveFatalECG_Thorax1_TRAIN    | 0.0241 | 31.587 | 0.024 | 31.36 | 0.0237 | 48.173 | 0.010 | 8.795 |
|                                      | 54     | 02     | 419   | 622   | 02     | 87     | 018   | 235   |
| NonInvasiveFatalECG_Thorax2_TRAIN    | 0.0197 | 34.786 | 0.025 | 36.96 | 0.0311 | 60.854 | 0.012 | 10.31 |
|                                      | 92     | 82     | 406   | 413   | 71     | 68     | 43    | 33    |
| OliveOil_TRAIN                       | 0.0111 | 11.439 | 0.011 | 11.41 | 0.0161 | 20.398 | 0.008 | 5.795 |
|                                      | 79     | 6      | 111   | 995   | 7      | 24     | 658   | 497   |
| OSULeaf_TRAIN                        | 0.0034 | 2.0059 | 0.003 | 2.024 | 0.0226 | 21.610 | 0.020 | 18.84 |
|                                      | 08     | 08     | 41    | 276   | 15     | 8      | 507   | 976   |
| PhalangesOutlinesCorrect_TRAIN       | 0.0156 | 3.5474 | 0.012 | 3.557 | 0.0627 | 7.1230 | 0.053 | 6.526 |
|                                      | 41     | 36     | 308   | 692   | 69     | 77     | 795   | 923   |
| Phoneme_TRAIN                        | 0.0019 | 2.8996 | 0.001 | 2.871 | 0.0642 | 71.371 | 0.004 | 3.612 |
|                                      | 29     | 17     | 919   | 204   | 61     | 75     | 492   | 47    |
| Plane_TRAIN                          | 0.0065 | 2.1715 | 0.006 | 2.149 | 0.0424 | 10.922 | 0.039 | 10.05 |
|                                      | 31     | 28     | 413   | 306   | 05     | 22     | 303   | 185   |
| ProximalPhalanxOutlineAgeGroup_TRAIN | 0.0117 | 2.7692 | 0.010 | 2.974 | 0.0635 | 5.9384 | 0.054 | 7.938 |
|                                      | 95     | 31     | 821   | 359   | 9      | 62     | 769   | 462   |
| ProximalPhalanxOutlineCorrect_TRAIN  | 0.0113 | 2.6205 | 0.010 | 2.815 | 0.0644 | 5.8717 | 0.054 | 7.779 |
|                                      | 85     | 13     | 154   | 385   | 1      | 95     | 103   | 487   |
| ProximalPhalanxTW_TRAIN              | 0.0584 | 9.5487 | 0.056 | 9.574 | 0.0858 | 8.0564 | 0.089 | 15.18 |
|                                      | 1      | 18     | 718   | 359   | 97     | 1      | 385   | 291   |
| RefrigerationDevices_TRAIN           | 0.0159 | 33.311 | 0.015 | 33.31 | 0.0097 | 14.792 | 0.012 | 29.13 |
|                                      | 83     | 8      | 983   | 846   | 5      | 5      | 315   | 746   |
| ScreenType_TRAIN                     | 0.0975 | 181.86 | 0.097 | 181.8 | 0.1233 | 250.14 | 0.088 | 153.2 |
|                                      | 35     | 84     | 535   | 684   |        | 28     | 251   | 955   |

|                              |              |              |              |              |              |              |              |              |
|------------------------------|--------------|--------------|--------------|--------------|--------------|--------------|--------------|--------------|
| ShapeletSim_TRAIN            | 0.0087<br>99 | 6.5848<br>06 | 0.008<br>783 | 6.573<br>561 | 0.2958<br>09 | 474.68<br>51 | 0.035<br>95  | 10.95<br>385 |
| ShapesAll_TRAIN              | 0.0056<br>61 | 2.5473<br>53 | 0.005<br>2   | 1.976<br>046 | 0.0453<br>94 | 55.756<br>08 | 0.063<br>887 | 64.40<br>488 |
| SmallKitchenAppliances_TRAIN | 0.1202<br>23 | 258.48<br>07 | 0.120<br>223 | 258.4<br>807 | 0.0939<br>27 | 192.38<br>71 | 0.106<br>317 | 227.2<br>055 |
| SonyAIBORobotSurfaceII_TRAIN | 0.0369<br>84 | 5.3761<br>9  | 0.036<br>984 | 5.376<br>19  | 0.1177<br>78 | 14.080<br>95 | 0.117<br>778 | 10.25<br>82  |
| SonyAIBORobotSurface_TRAIN   | 0.0225<br>3  | 5.9376<br>81 | 0.022<br>134 | 5.676<br>812 | 0.0769<br>43 | 7.9971<br>01 | 0.067<br>984 | 7.894<br>203 |
| StarLightCurves_TRAIN        | 0.0145<br>78 | 14.896<br>06 | 0.015<br>22  | 14.14<br>699 | 0.0441<br>39 | 91.663<br>74 | 0.017<br>614 | 20.92<br>2   |
| Strawberry_TRAIN             | 0.0113<br>83 | 5.5610<br>68 | 0.011<br>244 | 5.631<br>154 | 0.0239<br>59 | 12.547<br>86 | 0.016<br>311 | 6.247<br>721 |
| SwedishLeaf_TRAIN            | 0.0069<br>11 | 1.7460<br>32 | 0.006<br>059 | 1.491<br>27  | 0.0481<br>61 | 13.974<br>6  | 0.051<br>878 | 13.52<br>553 |
| Symbols_TRAIN                | 0.0169<br>87 | 7.7205<br>07 | 0.017<br>791 | 9.298<br>748 | 0.0759<br>14 | 100.05<br>72 | 0.046<br>397 | 34.80<br>104 |
| synthetic_control_TRAIN      | 0.0625<br>44 | 7.28         | 0.062<br>544 | 7.28         | 0.2596<br>49 | 46.913<br>33 | 0.138<br>158 | 8.677<br>778 |
| ToeSegmentation1_TRAIN       | 0.0108<br>54 | 5.8339<br>79 | 0.010<br>547 | 5.649<br>74  | 0.0213<br>85 | 9.8239<br>13 | 0.015<br>823 | 5.723<br>896 |
| ToeSegmentation2_TRAIN       | 0.0098<br>74 | 6.1923<br>24 | 0.009<br>789 | 6.283<br>65  | 0.0171<br>66 | 12.023<br>98 | 0.013<br>551 | 6.346<br>54  |
| Trace_TRAIN                  | 0.0418<br>19 | 18.075<br>6  | 0.043<br>105 | 18.35<br>202 | 0.1036<br>1  | 76.228<br>57 | 0.037<br>106 | 13.45<br>072 |
| TwoLeadECG_TRAIN             | 0.0104<br>94 | 3.0246<br>91 | 0.010<br>446 | 3.054<br>321 | 0.0517<br>09 | 9.5530<br>86 | 0.052<br>754 | 9.432<br>099 |
| Two_Patterns_TRAIN           | 0.0279<br>52 | 8.6986<br>77 | 0.027<br>952 | 8.698<br>677 | 0.0666<br>86 | 19.564<br>29 | 0.042<br>741 | 10.46<br>111 |
| UWaveGestureLibraryAll_TRAIN | 0.0087<br>34 | 18.784<br>47 | 0.008<br>785 | 18.91<br>981 | 0.0099<br>82 | 19.462<br>86 | 0.009<br>238 | 19.35<br>495 |
| uWaveGestureLibrary_X_TRAIN  | 0.0223<br>08 | 15.393<br>84 | 0.023<br>526 | 16.17<br>375 | 0.0371<br>31 | 28.426<br>09 | 0.033<br>404 | 21.95<br>961 |
| uWaveGestureLibrary_Y_TRAIN  | 0.0266<br>79 | 19.495<br>31 | 0.028<br>178 | 20.89<br>332 | 0.0363<br>1  | 25.039<br>05 | 0.030<br>916 | 22.38<br>201 |
| uWaveGestureLibrary_Z_TRAIN  | 0.0234<br>52 | 16.788<br>6  | 0.023<br>245 | 16.94<br>094 | 0.0404<br>49 | 28.322<br>22 | 0.030<br>351 | 20.46<br>337 |
| wafer_TRAIN                  | 0.0673<br>74 | 21.930<br>05 | 0.067<br>442 | 21.74<br>761 | 0.0908<br>3  | 22.914<br>77 | 0.075<br>524 | 23.94<br>341 |
| Wine_TRAIN                   | 0.0198<br>14 | 9.8925<br>57 | 0.019<br>825 | 9.913<br>07  | 0.0277<br>33 | 9.5282<br>05 | 0.053<br>979 | 26.71<br>275 |

|                     |        |        |       |       |        |        |       |       |
|---------------------|--------|--------|-------|-------|--------|--------|-------|-------|
| WordsSynonyms_TRAIN | 0.0109 | 4.8720 | 0.010 | 4.893 | 0.0259 | 15.704 | 0.024 | 10.52 |
|                     | 95     | 93     | 162   | 113   | 8      | 81     | 382   | 63    |
| WormsTwoClass_TRAIN | 0.0048 | 7.0853 | 0.004 | 7.002 | 0.0098 | 18.741 | 0.006 | 10.73 |
|                     | 94     | 66     | 828   | 669   | 13     | 33     | 631   | 929   |

**Table S2.** The Singularity Score for 38 pairs of signals from the biomedical dataset STEP

| EventDTW<br>SS | DTW<br>SS | shapeDTW<br>SS | dDTW<br>SS |
|----------------|-----------|----------------|------------|
| 214.7496       | 255.9367  | 6507.57        | 916.4238   |
| 652.0578       | 706.6031  | 9763.598       | 674.9932   |
| 207.9946       | 248.1262  | 8267.112       | 585.3234   |
| 863.2967       | 931.8183  | 9867.111       | 1840.99    |
| 271.7775       | 307.3894  | 6588.195       | 1014.131   |
| 312.8843       | 365.8864  | 8321.331       | 1420.998   |
| 199.4667       | 236.4396  | 5508.966       | 326.0338   |
| 165.706        | 202.4154  | 6240.588       | 521.357    |
| 151.0617       | 174.6621  | 3823.265       | 379.7549   |
| 726.1928       | 799.8118  | 9644.092       | 764.3193   |
| 98.12004       | 133.1142  | 5389.097       | 544.5346   |
| 234.3362       | 280.7707  | 6500.829       | 796.0459   |
| 210.5184       | 227.6504  | 2586.921       | 357.2649   |
| 407.1318       | 437.6987  | 5318.644       | 316.0044   |
| 596.9201       | 631.4459  | 5006.234       | 397.1649   |
| 827.2896       | 872.0031  | 8137.852       | 752.6112   |
| 338.6973       | 373.6216  | 5413.265       | 447.3042   |
| 360.1413       | 384.7664  | 4580.263       | 243.7712   |
| 567.2219       | 613.0839  | 7246.203       | 486.145    |
| 435.1125       | 458.8609  | 3372.282       | 254.1326   |
| 331.0873       | 362.1576  | 5033.389       | 527.209    |
| 419.9987       | 470.5904  | 6728.692       | 899.2313   |
| 476.1483       | 513.0718  | 6276.994       | 670.0777   |
| 166.6122       | 219.0746  | 9495.696       | 845.2175   |
| 462.5991       | 505.0618  | 6496.791       | 1006.34    |
| 179.9846       | 194.3681  | 2704.09        | 99.84207   |
| 265.9964       | 305.0589  | 6562.5         | 382.5716   |
| 453.4637       | 492.3472  | 6104.72        | 719.726    |
| 243.463        | 267.893   | 3835.516       | 214.2897   |
| 306.9594       | 339.4027  | 5547.813       | 443.2662   |
| 382.8466       | 411.8045  | 4633.256       | 709.9841   |
| 171.4716       | 210.6143  | 6106.256       | 1021.483   |
| 280.4449       | 334.315   | 8565.34        | 1669.624   |
| 1115.824       | 1161.347  | 7738.876       | 1273.979   |
| 266.8022       | 326.4465  | 8827.358       | 1065.5     |

|          |          |          |          |
|----------|----------|----------|----------|
| 202.3897 | 232.9697 | 3577.855 | 222.8987 |
| 740.5745 | 778.6155 | 5896.361 | 273.463  |
| 275.5137 | 310.9087 | 5592.405 | 453.0661 |

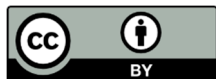

© 2020 by the authors. Licensee MDPI, Basel, Switzerland. This article is an open access article distributed under the terms and conditions of the Creative Commons Attribution (CC BY) license (<http://creativecommons.org/licenses/by/4.0/>).
